# Supplementary material for: Empirically adjusted fixed-effects meta-analysis methods in genomic studies
Source: publisher site journal article supplement (doi:10.1515/sagmb-2023-0041), 2024-01-01

**Supplementary figure 1:** Performances of METAL, Empirical Bayes adjusted and BACON adjusted methods when there is no effect of any hidden variable or confounder. The proportion of genes significant is considered to be 10%. The number of studies the genes are significant in is varied from 1 to 5.


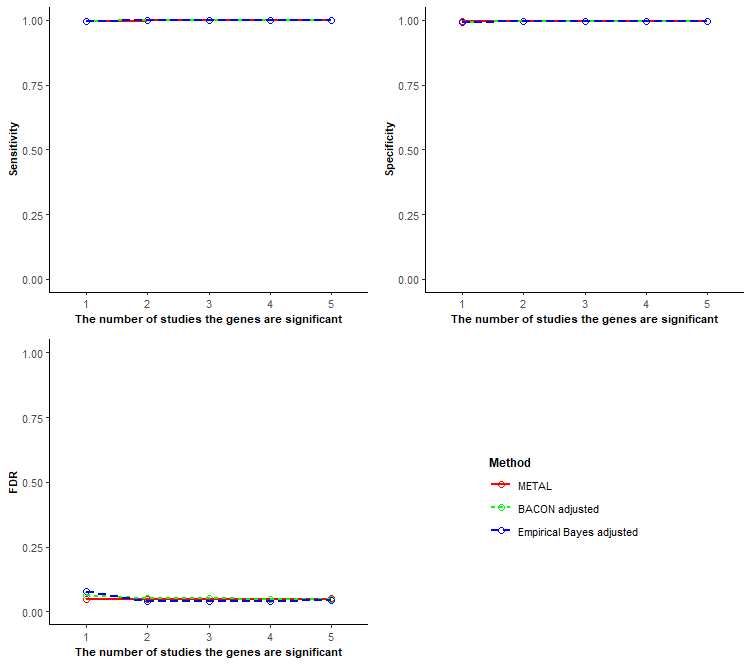

Supplement: Supplementary file 1 [file j_sagmb-2023-0041_suppl_001.docx]
